# Supplementary material for: α,β-(C–C–C) Agostic bonds in transition metal based olefin metathesis catalyses
Source: Royal Society of Chemistry journal article supplement (doi:10.1039/b508192k), 2005-01-01
Supplement: b508192k.pdf [file b508192k.pdf]

# Supporting Information

## $\alpha,\beta$ -(C–C–C) Agostic Bonds in Transition Metal Based Olefin Metathesis Catalyses

Cherumuttathu H. Suresh<sup>†,‡,\*</sup> and Mu-Hyun Baik<sup>†,\*</sup>

<sup>†</sup>*Department of Chemistry and School of Informatics, Indiana University, Bloomington, Indiana 47405*

<sup>‡</sup>*Division of Computational Modeling and Simulation, Regional Research Laboratory (CSIR), Trivandrum 695019, India*

## Computational Details.

All calculations were carried out using Density Functional Theory as implemented in the Jaguar 5.5 suite<sup>1</sup> of ab initio quantum chemistry programs. Geometry optimizations were performed with the B3LYP<sup>2-5</sup> functional and the 6-31G\*\* basis set. The transition metals were represented using the Los Alamos LACVP\*\* basis<sup>6, 7</sup> that includes relativistic effective core potentials for second and third row elements. The relative energies reported in the paper are evaluated by additional single-point calculations on optimized geometry using Dunning's correlation-consistent triple- $\xi$  basis set<sup>8</sup> cc-pVTZ(-f) that includes a double set of polarization functions. For quantifying the M-C2 bond order, we made use of the Mayer bond order formalism<sup>9-11</sup> implemented in the Amsterdam Density Functional package (ADF)<sup>12-14</sup> employing the BLYP functional (note that hybrid functionals are not available in 'pure DFT' implementations, such as the ADF program) and the triple- $\xi$  quality numerical basis set TZP that were generated from atomic calculations using the standard protocol implemented in ADF. ADF was also employed for fragment calculations in order to determine the bonding at the stationary points. We have carried out full geometry optimizations on the crystal structures of the molecules described in the following and have, in addition, studied model compounds, where some of the ligands were replaced by smaller surrogates to allow for a simpler analysis and visualization. These model compounds are labeled 4a, 5a, 6a and 7a – relating them to the realistic molecules mentioned in the main text.

The geometries optimized from the X-ray geometries of tantalum and tungsten complexes were very large and were not characterized with frequency analysis. The rest of the geometries were characterized as minima. In some cases, a small negative frequency of value below 30 cm<sup>-1</sup> observed as noise is neglected.

**Figure 1.**  $\alpha,\beta$ -(C-C-C) agostic bonding MO visualized using the small molecule models. Isosurfaces are drawn for 0.025 a.u.

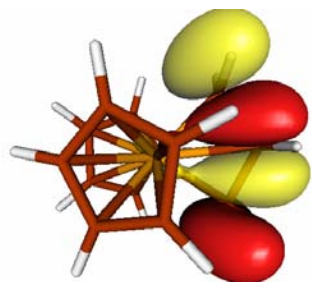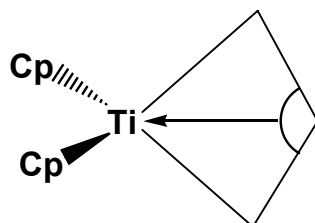

4a

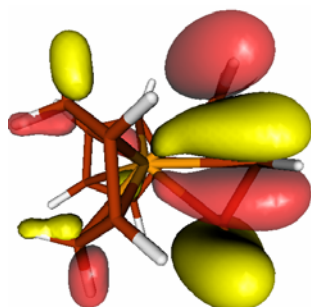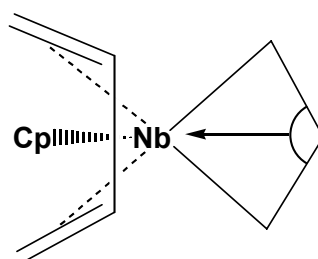

5a

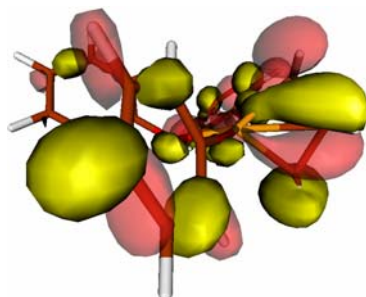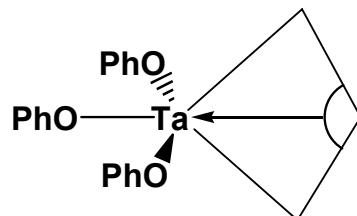

6a

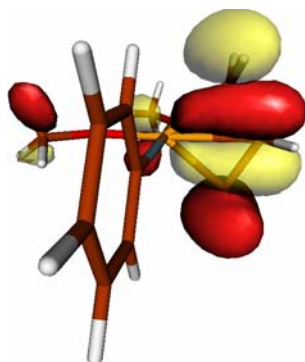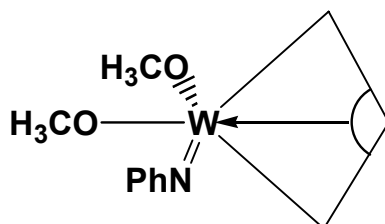

7a

**Figure 2.** Optimized structures of 16-electron ruthenium olefin complexes.

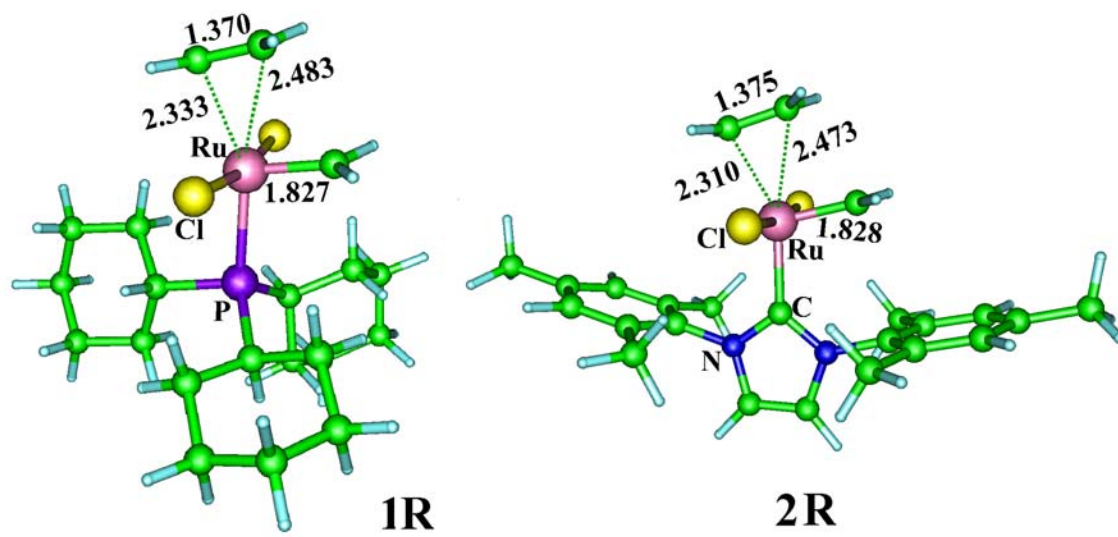

**Table 1.** Cartesian coordinates of optimized geometries are given below. The ID from the Cambridge Crystal Structure Database are also given.

| Structure 1R |              |              |              | Structure 2R |               |               |               |
|--------------|--------------|--------------|--------------|--------------|---------------|---------------|---------------|
| Ru           | 0.362405718  | 1.656287930  | 0.182849000  | Ru           | -0.1676180430 | 0.8500966870  | 0.0774639940  |
| C            | 1.953076498  | 2.221103854  | 0.880026385  | C            | -0.1011396030 | 0.9254021610  | 2.5295930100  |
| Cl           | 1.078726208  | 2.051281572  | -2.125091882 | C            | -0.3587840340 | 1.0134068320  | -2.3630440770 |
| Cl           | -0.673913940 | 1.490421113  | 2.390819482  | C            | 1.5977224380  | 1.3157751390  | -0.0051668880 |
| C            | 4.208025780  | -0.761863247 | -2.365552040 | C            | -4.5904326230 | -1.1503462400 | 1.2714543780  |
| C            | 3.283091191  | -0.400144008 | -1.191083932 | N            | -1.1925244830 | -2.0336175560 | 0.0370841890  |
| C            | 1.999050672  | -1.259275616 | -1.222289594 | C            | -3.2338602950 | -1.4875816010 | 1.2910901950  |
| C            | 2.389443455  | -2.755921090 | -1.174299374 | C            | -2.5806652690 | -1.6302017090 | 0.0533355100  |
| P            | 0.699215547  | -0.714759379 | 0.032969355  | C            | -3.2657048310 | -1.5199339260 | -1.1708419690 |
| C            | 3.295394593  | -3.122714736 | -2.363082922 | C            | -4.6209741910 | -1.1840130990 | -1.1264018760 |
| C            | 4.560671172  | -2.255351440 | -2.390517874 | C            | -0.8059036240 | -3.3718905650 | 0.0100955270  |
| C            | -2.991424884 | -0.784967204 | -2.037754281 | C            | -0.1039689150 | -1.2126805430 | 0.0384362740  |
| C            | 2.533148071  | -1.978758908 | 3.628102901  | C            | 0.5447547470  | -3.3872681910 | -0.0073812570 |
| C            | 2.151706186  | -1.077865127 | 2.441737358  | N            | 0.9655197810  | -2.0577105230 | 0.0112204110  |
| C            | 1.040972184  | -1.723292867 | 1.584821978  | C            | 4.3831142930  | -1.2607739500 | -1.2060115260 |
| C            | -0.196440316 | -2.031160867 | 2.457114716  | C            | -5.2973446570 | -0.9832762980 | 0.0789170580  |
| C            | 0.191329183  | -2.932191679 | 3.643889490  | C            | -6.7600615850 | -0.6083687290 | 0.0904469400  |
| C            | 1.310113507  | -2.313433720 | 4.492309644  | C            | -2.5929232310 | -1.7852720160 | -2.4932750850 |
| C            | -1.556751490 | -0.374788908 | -1.665128657 | C            | -2.5302072320 | -1.7233478500 | 2.6032010790  |
| C            | -0.972465157 | -1.310853133 | -0.584301969 | C            | 3.0122112860  | -1.5340932770 | -1.2303128620 |
| C            | -1.043030261 | -2.780451966 | -1.048030885 | C            | 2.3633078670  | -1.7088680780 | 0.0039724150  |
| C            | -2.486424949 | -3.180895879 | -1.397030932 | C            | 3.0499461330  | -1.6571786820 | 1.2291236320  |
| C            | -3.074843587 | -2.255506110 | -2.470765649 | C            | 4.4200515450  | -1.3847159890 | 1.1909403760  |
| H            | 2.132435078  | 2.238900305  | 1.960966907  | C            | 5.1017132200  | -1.1761233490 | -0.0108088430 |
| H            | 2.758714220  | 2.592570816  | 0.236356767  | C            | 6.5780613850  | -0.8576431240 | -0.0154577000 |
| H            | 5.120536109  | -0.156199281 | -2.312233403 | C            | 2.3457812800  | -1.8870477640 | 2.5434735590  |
| H            | 3.705294410  | -0.485745316 | -3.302495351 | C            | 2.2697067270  | -1.6388583420 | -2.5396761600 |
| H            | 3.023178440  | 0.656088165  | -1.247698275 | H            | 2.1897643470  | 1.4585586020  | 0.9041666270  |
| H            | 3.816750730  | -0.573909073 | -0.245995364 | H            | 2.0936835000  | 1.4943898580  | -0.9643428880 |
| H            | 1.501956909  | -1.051437936 | -2.179682370 | H            | -5.1106878280 | -1.0368346120 | 2.2199196300  |
| H            | 1.513227399  | -3.408423005 | -1.163699625 | H            | -5.1648212200 | -1.0956066360 | -2.0641956600 |
| H            | 2.940645344  | -2.954685624 | -0.245739949 | H            | -1.5336128280 | -4.1675138450 | 0.0060593670  |
| H            | 3.559168678  | -4.185972613 | -2.307698859 | H            | 1.2519944200  | -4.2005929670 | -0.0311240700 |
| H            | 2.735226255  | -2.986511014 | -3.298851377 | H            | 4.9027883160  | -1.1212646340 | -2.1514844620 |
| H            | 5.165738262  | -2.492002892 | -3.273817210 | H            | -7.2872310260 | -1.0296980830 | -0.7708055670 |
| H            | 5.178315469  | -2.497648603 | -1.513501661 | H            | -6.8872803660 | 0.4800747520  | 0.0487952350  |
| H            | -3.363409391 | -0.129698627 | -2.833731006 | H            | -7.2557721880 | -0.9593103740 | 1.0002180810  |
| H            | -3.644730160 | -0.627524856 | -1.168037139 | H            | -2.0546664520 | -2.7391014510 | -2.4888271100 |
| H            | 3.305444808  | -1.485675620 | 4.230506728  | H            | -3.3342553170 | -1.8202990250 | -3.2952346530 |
| H            | 2.978847355  | -2.910321735 | 3.249526790  | H            | -1.8663196330 | -1.0007086080 | -2.7287451440 |
| H            | 3.040751246  | -0.870738959 | 1.835223155  | H            | -1.9923285760 | -2.6775552860 | 2.6050314140  |
| H            | 1.781347651  | -0.116723747 | 2.815714608  | H            | -3.2534214550 | -1.7425277660 | 3.4221517420  |
| H            | 1.420415042  | -2.682070033 | 1.207335621  | H            | -1.7958292390 | -0.9378918430 | 2.8103736840  |
| H            | -0.967921600 | -2.539531615 | 1.869603393  | H            | 4.9682535940  | -1.3417672090 | 2.1295522390  |
| H            | -0.627977724 | -1.093465119 | 2.819763784  | H            | 7.0892099150  | -1.3185445930 | 0.8349112510  |
| H            | -0.695411130 | -3.120982479 | 4.260509385  | H            | 6.7463546900  | 0.2242255160  | 0.0518677880  |
| H            | 0.522964530  | -3.910477278 | 3.264968562  | H            | 7.0597955870  | -1.2049893110 | -0.9340787870 |
| H            | 1.592199723  | -2.993569517 | 5.305008722  | H            | 1.8000935830  | -2.8367948890 | 2.5491426060  |
| H            | 0.938470068  | -1.392851125 | 4.962043458  | H            | 3.0666038820  | -1.9076359060 | 3.3645907620  |
| H            | -1.561141532 | 0.666375396  | -1.316495237 | H            | 1.6163954250  | -1.0937340990 | 2.7444282670  |
| H            | -0.918605620 | -0.379311617 | -2.557035671 | H            | 1.7234690250  | -2.5854818120 | -2.6180167340 |
| H            | -1.599037563 | -1.200540937 | 0.310578053  | H            | 2.9667181310  | -1.5814220170 | -3.3794869310 |
| H            | -0.644571964 | -3.452186324 | -0.279496782 | H            | 1.5318569780  | -0.8354684580 | -2.6481198280 |
| H            | -0.418814762 | -2.909800644 | -1.941110965 | C            | -1.2960516650 | 2.8705886860  | 0.1776891340  |
| H            | -2.507033949 | -4.224113847 | -1.734328385 | C            | -0.0048976620 | 3.3284268330  | 0.0993890160  |
| H            | -3.105399732 | -3.131197454 | -0.490184634 | H            | -1.7833362070 | 2.7888987860  | 1.1441955690  |

|   |              |              |              |   |               |              |               |
|---|--------------|--------------|--------------|---|---------------|--------------|---------------|
| H | -4.114521330 | -2.530268938 | -2.683637464 | H | -1.9013950780 | 2.8052463500 | -0.7211449690 |
| H | -2.515777755 | -2.390338916 | -3.407623760 | H | 0.5374687970  | 3.5966546110 | 0.9998295960  |
| C | -0.941961821 | 3.568643998  | -0.102126213 | H | 0.4204628980  | 3.6089207020 | -0.8582490410 |
| C | 0.192231438  | 4.119907973  | 0.434280690  |   |               |              |               |
| H | -1.077256205 | 3.555003424  | -1.179030443 |   |               |              |               |
| H | -1.782384196 | 3.328609550  | 0.541904561  |   |               |              |               |
| H | 0.265852539  | 4.299423208  | 1.501327649  |   |               |              |               |
| H | 0.963160295  | 4.524186339  | -0.212847123 |   |               |              |               |

Structure 1

|    |              |              |              |
|----|--------------|--------------|--------------|
| Ru | -0.211232967 | 2.481676309  | -0.941906360 |
| C  | 0.305464198  | 4.076030033  | -1.982427522 |
| C  | -0.944117895 | 3.739049798  | 0.392246491  |
| Cl | -2.393534338 | 2.548858496  | -2.055399737 |
| Cl | 1.922608458  | 2.612376178  | 0.223786638  |
| C  | -0.325875362 | 4.726587725  | -0.685172038 |
| C  | -1.197800633 | 0.159307270  | -5.342112308 |
| C  | -0.441505600 | 0.516481183  | -4.051223139 |
| C  | -0.834094637 | -0.449664598 | -2.907504761 |
| C  | -0.530683727 | -1.905614549 | -3.332412199 |
| P  | -0.137348774 | 0.061620127  | -1.235318600 |
| C  | -1.295094815 | -2.266298506 | -4.619250008 |
| C  | -0.963215106 | -1.298461017 | -5.763187487 |
| C  | -3.374480540 | -0.606345667 | 1.444716729  |
| C  | 3.889097859  | -1.039720408 | -1.937171345 |
| C  | 2.588182350  | -0.221012577 | -2.001624694 |
| C  | 1.512189332  | -0.817660190 | -1.065626547 |
| C  | 2.042289473  | -0.901720769 | 0.383365833  |
| C  | 3.343664259  | -1.722336424 | 0.435582394  |
| C  | 4.416712445  | -1.149843374 | -0.500441876 |
| C  | -2.632151559 | -0.079631210 | 0.203936590  |
| C  | -1.212621924 | -0.681692192 | 0.121269817  |
| C  | -1.297575729 | -2.226508836 | 0.107376986  |
| C  | -2.021772846 | -2.744282523 | 1.362151412  |
| C  | -3.427307715 | -2.139875581 | 1.483768186  |
| H  | 1.377558619  | 4.244967250  | -2.064120939 |
| H  | -0.279313298 | 4.253303074  | -2.882831508 |
| H  | -0.414270030 | 3.765101322  | 1.342523631  |
| H  | -2.029930734 | 3.785188774  | 0.443761607  |
| H  | 0.477490407  | 5.262583452  | -0.181215940 |
| H  | -1.155206732 | 5.345499505  | -1.028586805 |
| H  | -0.893271272 | 0.841383817  | -6.144303046 |
| H  | -2.270407649 | 0.328333476  | -5.178215608 |
| H  | -0.671495746 | 1.544143309  | -3.767239200 |
| H  | 0.638162931  | 0.449899604  | -4.238285875 |
| H  | -1.915080241 | -0.335883626 | -2.754182600 |
| H  | -0.783060022 | -2.619467476 | -2.544247499 |
| H  | 0.545489426  | -2.013099653 | -3.520377674 |
| H  | -1.058662209 | -3.297744764 | -4.906937570 |
| H  | -2.374445469 | -2.236787812 | -4.415635960 |
| H  | -1.558692063 | -1.541885979 | -6.650801580 |
| H  | 0.090667614  | -1.429037097 | -6.047712482 |
| H  | -4.387343283 | -0.188438950 | 1.464943842  |
| H  | -2.866495383 | -0.238962563 | 2.347694598  |
| H  | 4.641790423  | -0.580402889 | -2.588373919 |
| H  | 3.704319154  | -2.048302313 | -2.335478796 |
| H  | 2.229519474  | -0.193396163 | -3.035796915 |
| H  | 2.783802334  | 0.812133652  | -1.694893494 |
| H  | 1.300864712  | -1.842032725 | -1.404660991 |
| H  | 1.303331450  | -1.366725520 | 1.043687429  |

Structure 2

|    |              |              |              |
|----|--------------|--------------|--------------|
| Ru | 0.003914877  | 1.322276293  | 0.156011415  |
| C  | -1.356533659 | 2.739356189  | 0.349759835  |
| Cl | -0.059279237 | 1.032301008  | 2.581921299  |
| Cl | 0.062139576  | 1.816035517  | -2.237132894 |
| C  | 1.341516604  | 2.747796235  | 0.423455305  |
| C  | -0.014423858 | 3.563859951  | 0.518178575  |
| H  | -1.948160937 | 2.687136138  | 1.261290253  |
| H  | -1.900140693 | 2.981499313  | -0.560957289 |
| H  | 1.882549771  | 2.699722813  | 1.366099852  |
| H  | 1.932300077  | 2.996003385  | -0.455760111 |
| H  | -0.042444564 | 3.998127223  | 1.517244146  |
| H  | 0.006108895  | 4.288655859  | -0.295227803 |
| C  | -4.537273805 | -0.714474348 | 0.587921091  |
| N  | -1.044754268 | -1.518470550 | -0.410172313 |
| C  | -3.193330744 | -1.087165243 | 0.695809654  |
| C  | -2.429863931 | -1.102740729 | -0.483806801 |
| C  | -2.978229539 | -0.810684303 | -1.745138819 |
| C  | -4.327415974 | -0.448239621 | -1.792114514 |
| C  | -0.627225013 | -2.839371848 | -0.583563652 |
| C  | 0.024040456  | -0.712306320 | -0.175795128 |
| C  | 0.720378913  | -2.845514288 | -0.457120964 |
| N  | 1.110191139  | -1.529001520 | -0.204373720 |
| C  | 4.578719657  | -0.382570480 | -0.908525369 |
| C  | -5.117486906 | -0.381984218 | -0.639973956 |
| C  | -6.562882668 | 0.045031940  | -0.721988897 |
| C  | -2.158513847 | -0.883418953 | -3.008249864 |
| C  | -2.606551099 | -1.469793424 | 2.031154329  |
| C  | 3.241663573  | -0.731413767 | -1.124824388 |
| C  | 2.487755879  | -1.128462143 | -0.006778152 |
| C  | 3.040485317  | -1.231647348 | 1.281700940  |
| C  | 4.382889203  | -0.873363590 | 1.436817411  |
| C  | 5.162154484  | -0.435910575 | 0.361156719  |
| C  | 6.599685615  | -0.025130268 | 0.568511693  |
| C  | 2.232540945  | -1.710803394 | 2.460593543  |
| C  | 2.652294451  | -0.692651157 | -2.512186412 |
| H  | -5.145557847 | -0.696430790 | 1.488774117  |
| H  | -4.770453658 | -0.217867901 | -2.757799964 |
| H  | -1.333483271 | -3.630341189 | -0.776850778 |
| H  | 1.443431162  | -3.642343903 | -0.520971689 |
| H  | 5.179510818  | -0.073031913 | -1.760096676 |
| H  | -7.013640952 | -0.251491816 | -1.673781408 |
| H  | -6.653627536 | 1.135547803  | -0.644740965 |
| H  | -7.155576305 | -0.389857163 | 0.087997580  |
| H  | -1.634282863 | -1.841210739 | -3.097416555 |
| H  | -2.801855973 | -0.769273681 | -3.884278658 |
| H  | -1.404086657 | -0.089782157 | -3.028757297 |
| H  | -2.082003251 | -2.430268156 | 1.979089060  |
| H  | -3.397469986 | -1.558795104 | 2.780157464  |
| H  | -1.883614517 | -0.724108665 | 2.380065840  |
| H  | 4.829151816  | -0.945464666 | 2.425495331  |
| H  | 7.057614100  | -0.576363012 | 1.395113876  |

|   |              |              |              |   |             |              |              |
|---|--------------|--------------|--------------|---|-------------|--------------|--------------|
| H | 2.223878068  | 0.109738796  | 0.757880275  | H | 6.670561059 | 1.042604128  | 0.810107036  |
| H | 3.712083453  | -1.751698480 | 1.467537076  | H | 7.198630684 | -0.196070427 | -0.330773164 |
| H | 3.130341015  | -2.763127150 | 0.149840894  | H | 1.723389492 | -2.656736778 | 2.246032756  |
| H | 5.317887515  | -1.773850775 | -0.472912151 | H | 2.881299552 | -1.866576503 | 3.326140259  |
| H | 4.708112521  | -0.152497828 | -0.146283377 | H | 1.465956495 | -0.976960555 | 2.731400452  |
| H | -2.593850118 | 1.010519024  | 0.220236737  | H | 2.146278982 | -1.632225095 | -2.760362620 |
| H | -3.196454819 | -0.342429172 | -0.699610429 | H | 3.439320857 | -0.529077540 | -3.252716175 |
| H | -0.672415535 | -0.381641036 | 1.030226393  | H | 1.913464125 | 0.110217837  | -2.611304859 |
| H | -0.305909650 | -2.683614333 | 0.036031327  |   |             |              |              |
| H | -1.862050462 | -2.546119940 | -0.776751788 |   |             |              |              |
| H | -2.074276490 | -3.838919826 | 1.327814547  |   |             |              |              |
| H | -1.431150207 | -2.486285740 | 2.252196872  |   |             |              |              |
| H | -3.911524233 | -2.483260078 | 2.405202398  |   |             |              |              |
| H | -4.046076552 | -2.501938392 | 0.650577338  |   |             |              |              |

**(PH<sub>3</sub>)Cl<sub>2</sub>Ru(C<sub>3</sub>H<sub>6</sub>) - Structure 3**

|    |              |              |              |
|----|--------------|--------------|--------------|
| Ru | -0.015392854 | 0.050441813  | -0.034777395 |
| C  | -0.648843226 | 1.817452046  | 0.567740849  |
| C  | -0.226548665 | 0.698566384  | -1.879961135 |
| Cl | 2.290751584  | 0.794571569  | 0.034508172  |
| P  | 0.673866822  | -1.968244395 | 1.034877400  |
| Cl | -2.282658234 | -0.814865048 | -0.014179349 |
| C  | -0.677365222 | 1.951420614  | -1.012555222 |
| H  | -1.639633419 | 1.829179010  | 1.016834740  |
| H  | 0.106354170  | 2.443703072  | 1.038078286  |
| H  | 0.701099678  | 0.867098282  | -2.423020688 |
| H  | -1.044708055 | 0.252453711  | -2.441511056 |
| H  | -0.078643901 | -3.140344683 | 0.836543415  |
| H  | 1.995865542  | -2.416397929 | 0.857153399  |
| H  | 0.612827589  | -1.839428204 | 2.436641628  |
| H  | -1.718208802 | 2.136361218  | -1.276114584 |
| H  | 0.019902907  | 2.751894546  | -1.257823271 |

**(PH<sub>3</sub>)<sub>2</sub>Cl<sub>2</sub>Ru(C<sub>3</sub>H<sub>6</sub>)**

|    |              |              |              |
|----|--------------|--------------|--------------|
| Ru | 0.919653716  | -0.016985344 | -0.039345398 |
| C  | -0.945920947 | 0.236589189  | -1.178621785 |
| C  | -0.980890792 | -0.191179845 | 1.055439457  |
| Cl | 1.809297503  | 0.359718777  | -2.219544074 |
| P  | 1.028460216  | 2.303108032  | 0.411513283  |
| Cl | 1.741185851  | -0.479284698 | 2.151084910  |
| C  | -1.867416112 | 0.435172393  | 0.003258213  |
| P  | 1.017024635  | -2.341813708 | -0.482618607 |
| H  | -0.821757869 | 1.070882252  | -1.866491451 |
| H  | -1.107641243 | -0.687036008 | -1.734937967 |
| H  | -1.153504586 | -1.254437052 | 1.224164732  |
| H  | -0.883313140 | 0.327348178  | 2.007443050  |
| H  | 2.325321541  | 2.849004068  | 0.527121589  |
| H  | 0.489968576  | 3.232129809  | -0.508806660 |
| H  | 0.472921483  | 2.819947545  | 1.604734512  |
| H  | -2.031298539 | 1.499861529  | 0.204187852  |
| H  | -2.854832028 | -0.037580924 | -0.102078271 |
| H  | 2.305338658  | -2.911002973 | -0.571886813 |
| H  | 0.439255324  | -3.251183842 | 0.432714970  |
| H  | 0.471382512  | -2.847346214 | -1.685003581 |

**Calculated JJKEO DFT Real - Structure 4**

|    |              |              |              |
|----|--------------|--------------|--------------|
| Ti | -2.606053220 | -0.184576629 | -1.071945867 |
| C  | -1.377097557 | 0.126612552  | -2.779038094 |
| C  | -0.190778669 | -0.152377169 | -1.813394651 |
| C  | -0.714384773 | -0.966869187 | -0.555516722 |
| C  | -0.080046598 | -2.365268434 | -0.739900715 |
| C  | 1.377082264  | -2.274192731 | -0.224260388 |
| C  | 2.030171119  | -1.256191994 | -1.227191794 |
| C  | 0.923781715  | -1.101746220 | -2.358616912 |
| C  | 0.221607598  | -2.469756327 | -2.249364358 |
| C  | 1.499798108  | -0.724872950 | -3.717660329 |
| C  | 1.531016998  | -2.026090132 | 1.264568128  |
| C  | 3.129610174  | -1.583766260 | 2.988043827  |
| C  | 3.365201231  | -2.889605472 | 3.737668016  |
| C  | 4.332746907  | -0.652950848 | 2.973275627  |
| C  | 2.449960621  | 0.078611065  | -0.642248955 |
| C  | 3.856995895  | 1.992137632  | -1.071574229 |
| C  | 5.272629230  | 1.850414594  | -0.526120862 |
| C  | 3.775921356  | 2.848687526  | -2.328145355 |
| O  | 2.833569389  | -1.883675666 | 1.594394219  |
| O  | 0.626012101  | -2.043642918 | 2.073586731  |
| O  | 3.378302364  | 0.663170683  | -1.434215782 |

**Calculated JJKEO DFT Structure 4a**

|    |              |              |              |
|----|--------------|--------------|--------------|
| Ti | -0.399835771 | -0.118053194 | -0.120913715 |
| C  | 1.041632775  | 0.234432302  | -1.607016180 |
| C  | 2.037485319  | 0.220456833  | -0.388023776 |
| C  | 1.400734216  | -0.296054541 | 0.955529781  |
| H  | 1.254352892  | -0.576079024 | -2.302244878 |
| H  | 1.057419648  | 1.181589453  | -2.144232894 |
| H  | 2.886405683  | -0.420349973 | -0.641917923 |
| H  | 2.415092100  | 1.232353179  | -0.227464691 |
| H  | 1.727963433  | -1.306361014 | 1.196207964  |
| H  | 1.629830321  | 0.362362653  | 1.790045084  |
| C  | -0.871688961 | -2.021491253 | -1.577177116 |
| C  | -2.096636358 | -1.610193132 | -1.009658534 |
| C  | -2.028042724 | -1.833698369 | 0.394158205  |
| C  | -0.757790585 | -2.370594287 | 0.690484880  |
| C  | -0.037339188 | -2.473250102 | -0.527269026 |
| H  | -0.612339444 | -1.969815290 | -2.624063402 |
| H  | -2.937405981 | -1.197175492 | -1.549591025 |
| H  | -2.808820716 | -1.617484734 | 1.109992427  |
| H  | -0.389118594 | -2.625470385 | 1.673484314  |
| H  | 0.984316829  | -2.811347596 | -0.631951017 |
| C  | -0.483737432 | 1.896448710  | 1.253118682  |

|   |              |              |              |   |              |             |              |
|---|--------------|--------------|--------------|---|--------------|-------------|--------------|
| O | 2.000094257  | 0.595034689  | 0.363248739  | C | -1.720942366 | 1.223928827 | 1.394817552  |
| H | -1.481596563 | -0.637100045 | -3.549914636 | C | -2.381690442 | 1.259683083 | 0.139768176  |
| H | -1.336498375 | 1.108771672  | -3.248922644 | C | -1.538561649 | 1.915176165 | -0.784681188 |
| H | 0.239396171  | 0.799785358  | -1.502152889 | C | -0.365552203 | 2.313032217 | -0.092400542 |
| H | -0.369309573 | -0.543299667 | 0.379930288  | H | 0.239330262  | 2.060241507 | 2.037101419  |
| H | -0.632616431 | -3.193765106 | -0.291050187 | H | -2.096593928 | 0.768287220 | 2.300832634  |
| H | 1.875609800  | -3.240151907 | -0.386187011 | H | -3.350391936 | 0.832938416 | -0.077899117 |
| H | 2.920361731  | -1.690321123 | -1.689051476 | H | -1.742340669 | 2.073366151 | -1.834753188 |
| H | -0.655510255 | -2.519452026 | -2.893752717 | H | 0.477815493  | 2.831657779 | -0.524490088 |
| H | 0.877904547  | -3.310717301 | -2.500242901 |   |              |             |              |
| H | 2.220045318  | -1.476765106 | -4.058744353 |   |              |             |              |
| H | 2.019498398  | 0.236301781  | -3.675951450 |   |              |             |              |
| H | 0.706353458  | -0.649128386 | -4.465862545 |   |              |             |              |
| H | 2.256754583  | -1.073953707 | 3.402653178  |   |              |             |              |
| H | 3.606008725  | -2.686506118 | 4.785884859  |   |              |             |              |
| H | 4.197422689  | -3.444845012 | 3.293567078  |   |              |             |              |
| H | 2.467597051  | -3.511452674 | 3.706522044  |   |              |             |              |
| H | 4.094657912  | 0.256098205  | 2.415600485  |   |              |             |              |
| H | 5.195098245  | -1.138676801 | 2.505529828  |   |              |             |              |
| H | 4.607146721  | -0.374173807 | 3.995115574  |   |              |             |              |
| H | 3.192037650  | 2.380235598  | -0.297188704 |   |              |             |              |
| H | 5.284344159  | 1.208327888  | 0.357998469  |   |              |             |              |
| H | 5.668656117  | 2.830936278  | -0.244265097 |   |              |             |              |
| H | 5.934185630  | 1.414073188  | -1.280757694 |   |              |             |              |
| H | 2.745800070  | 2.912147546  | -2.688821881 |   |              |             |              |
| H | 4.396442496  | 2.427724945  | -3.125051723 |   |              |             |              |
| H | 4.128583498  | 3.862588907  | -2.116011839 |   |              |             |              |
| C | -3.889929135 | -1.606301564 | -2.578817487 |   |              |             |              |
| C | -4.789554569 | -0.899765761 | -1.746063264 |   |              |             |              |
| C | -4.607226687 | -1.362628595 | -0.413628256 |   |              |             |              |
| C | -3.575802463 | -2.324427443 | -0.420972611 |   |              |             |              |
| C | -3.142557019 | -2.481985752 | -1.760542191 |   |              |             |              |
| H | -3.785460119 | -1.480141442 | -3.646405216 |   |              |             |              |
| H | -5.494598116 | -0.147631865 | -2.071186411 |   |              |             |              |
| H | -5.140667001 | -1.014219711 | 0.458903561  |   |              |             |              |
| H | -3.181878254 | -2.844904678 | 0.440690235  |   |              |             |              |
| H | -2.368889942 | -3.155256974 | -2.089802710 |   |              |             |              |
| C | -1.848412578 | 1.516716808  | 0.545168620  |   |              |             |              |
| C | -3.168847493 | 1.143307051  | 0.894424169  |   |              |             |              |
| C | -4.035556229 | 1.591813599  | -0.135513199 |   |              |             |              |
| C | -3.249941453 | 2.192699181  | -1.141034793 |   |              |             |              |
| C | -1.898444777 | 2.155539474  | -0.713341664 |   |              |             |              |
| H | -0.957135779 | 1.338856174  | 1.128235331  |   |              |             |              |
| H | -3.461414924 | 0.615443829  | 1.792089136  |   |              |             |              |
| H | -5.108344490 | 1.467400814  | -0.160245531 |   |              |             |              |
| H | -3.611724534 | 2.603530679  | -2.073975372 |   |              |             |              |
| H | -1.055751131 | 2.555666455  | -1.256858902 |   |              |             |              |

**Calculated ROMSIV01 DFT Real - Structure 5**

**Calculated ROMSIV01 DFT Model - Structure 5a**

|    |              |              |              |    |              |              |              |
|----|--------------|--------------|--------------|----|--------------|--------------|--------------|
| Nb | -1.731437046 | 0.247767791  | -0.114738871 | Nb | 0.288210350  | -0.104464939 | -0.215600478 |
| C  | -1.503121487 | -2.061987587 | 0.093333318  | C  | -0.141701239 | -2.253844839 | -1.033190271 |
| C  | -0.544983805 | -1.715616937 | -0.913356714 | C  | 1.072303117  | -1.866705947 | -1.684400844 |
| C  | -1.012232985 | -1.031482298 | -2.038682991 | C  | 1.049206913  | -0.690841595 | -2.441591069 |
| C  | -2.418521936 | -0.756629994 | -2.099422517 | C  | -0.189624357 | 0.021746335  | -2.507185945 |
| C  | -0.817991962 | 1.795585138  | -1.368568758 | C  | 1.821085144  | 1.391298373  | -0.549142988 |
| C  | 0.350219836  | 1.693581243  | -0.324967736 | C  | 2.607765670  | 0.466100336  | 0.481938899  |
| C  | 0.198299702  | 0.594364314  | 0.885410872  | C  | 1.932477458  | -0.906142598 | 0.946219420  |
| C  | 1.477542802  | -0.145600145 | 0.895194143  | C  | -1.259588409 | 1.717478108  | 0.461895307  |
| C  | 1.976075269  | -1.123116205 | 1.739585380  | C  | -2.087658086 | 0.660860558  | -0.005608267 |



|   |              |              |              |   |              |              |              |
|---|--------------|--------------|--------------|---|--------------|--------------|--------------|
| C | 3.243659318  | -1.700372910 | 1.452781485  | C | -1.939223773 | -0.438100970 | 0.880586409  |
| C | 4.006526170  | -1.324526841 | 0.360731315  | C | -1.022345990 | -0.062512270 | 1.899516759  |
| C | 4.179375237  | 0.204970835  | -1.675139846 | C | -0.603001057 | 1.270925474  | 1.640606199  |
| C | 3.580010398  | 1.204477790  | -2.422687424 | H | -0.080105334 | -3.055242497 | -0.300688269 |
| C | 2.317442353  | 1.758603180  | -2.076873972 | H | -1.071045042 | -2.248506104 | -1.599176670 |
| C | 1.671307798  | 1.282735407  | -0.954346975 | H | 2.013427563  | -2.372826536 | -1.494053664 |
| C | 2.276174684  | 0.255528727  | -0.204323749 | H | 1.972836474  | -0.283560614 | -2.841087388 |
| C | 3.532383642  | -0.309693423 | -0.518169726 | H | -0.168311240 | 1.022365267  | -2.931973399 |
| H | -1.107447770 | -2.420491024 | 1.042014800  | H | -1.102552370 | -0.528106158 | -2.726639086 |
| H | -2.434109362 | -2.543310849 | -0.200916848 | H | 1.581192358  | 2.361997551  | -0.111265154 |
| H | 0.519373828  | -1.839725208 | -0.753445527 | H | 2.386646140  | 1.534089911  | -1.467196766 |
| H | -0.305042472 | -0.618231364 | -2.750158801 | H | 3.527467519  | 0.177828460  | -0.026012700 |
| H | -2.758997132 | -0.080596857 | -2.881323864 | H | 2.850875577  | 1.053494036  | 1.369258161  |
| H | -3.114347918 | -1.568079476 | -1.895673340 | H | 2.548265412  | -1.757762549 | 0.667949123  |
| H | -1.325313641 | 2.760566463  | -1.315466963 | H | 1.764776132  | -0.915337458 | 2.024816118  |
| H | -0.468137693 | 1.623443430  | -2.383523723 | H | -1.145655904 | 2.687031288  | -0.002258382 |
| H | 0.440956862  | 2.668432433  | 0.168762911  | H | -2.714822591 | 0.688462480  | -0.884127937 |
| H | -0.023063835 | 1.070974603  | 1.841742473  | H | -2.436644639 | -1.394093562 | 0.795133288  |
| H | 1.412731524  | -1.464108642 | 2.604268665  | H | -0.705596779 | -0.681455362 | 2.726787141  |
| H | 3.620304551  | -2.474047302 | 2.117234833  | H | 0.095952922  | 1.844044318  | 2.235516903  |
| H | 4.967695256  | -1.795938012 | 0.174629553  |   |              |              |              |
| H | 5.146822726  | -0.191518241 | -1.972582649 |   |              |              |              |
| H | 4.089723059  | 1.583741743  | -3.304475381 |   |              |              |              |
| H | 1.885113421  | 2.544308924  | -2.690450441 |   |              |              |              |
| C | -3.746601253 | 1.690369684  | 0.100232242  |   |              |              |              |
| C | -4.203076700 | 0.350986387  | 0.314085349  |   |              |              |              |
| C | -3.605036442 | -0.132366309 | 1.517623820  |   |              |              |              |
| C | -2.792472489 | 0.910661380  | 2.060271971  |   |              |              |              |
| C | -2.877993617 | 2.037750747  | 1.184151805  |   |              |              |              |
| C | -4.233463753 | 2.619012522  | -0.976701058 |   |              |              |              |
| C | -5.258551484 | -0.365146492 | -0.480254991 |   |              |              |              |
| C | -3.929639456 | -1.428514421 | 2.205208557  |   |              |              |              |
| C | -2.132481596 | 0.882210490  | 3.409805749  |   |              |              |              |
| C | -2.272736481 | 3.390646756  | 1.436165451  |   |              |              |              |
| H | -4.468449675 | 2.079791466  | -1.898101104 |   |              |              |              |
| H | -3.491892868 | 3.382796803  | -1.223698454 |   |              |              |              |
| H | -5.145211745 | 3.140390231  | -0.656354095 |   |              |              |              |
| H | -5.072418612 | -1.441446002 | -0.531753932 |   |              |              |              |
| H | -5.318155470 | 0.009318223  | -1.504731025 |   |              |              |              |
| H | -6.246364998 | -0.228060945 | -0.020218546 |   |              |              |              |
| H | -4.223452064 | -2.203902091 | 1.493333474  |   |              |              |              |
| H | -4.760843620 | -1.294436388 | 2.909863918  |   |              |              |              |
| H | -3.076722195 | -1.811223934 | 2.772158597  |   |              |              |              |
| H | -1.295340784 | 1.582482957  | 3.475832115  |   |              |              |              |
| H | -1.753452023 | -0.113336015 | 3.656943544  |   |              |              |              |
| H | -2.848792834 | 1.165317119  | 4.192486434  |   |              |              |              |
| H | -2.110827570 | 3.943861956  | 0.507034704  |   |              |              |              |
| H | -1.310906132 | 3.319897279  | 1.953335384  |   |              |              |              |
| H | -2.933242756 | 4.000978337  | 2.065616038  |   |              |              |              |

**Calculated GIFHAE DFT Real - Structure 6**

|    |              |             |             |
|----|--------------|-------------|-------------|
| Ta | -0.212759880 | 0.672400816 | 0.088869778 |
| O  | -0.178670023 | 2.447343734 | 0.860599383 |
| C  | -0.557447951 | 3.699304106 | 1.252279660 |
| C  | -0.438749592 | 4.044093067 | 2.622922751 |
| C  | 0.101307273  | 3.043145615 | 3.632689847 |
| C  | 1.641300244  | 3.103260420 | 3.682459177 |
| C  | -0.484114427 | 3.199552398 | 5.044810265 |
| C  | -0.796082650 | 5.334467034 | 3.020610957 |
| C  | -1.261101959 | 6.274113664 | 2.103134878 |

**Calculated GIFHAE DFT Model - Structure 6a**

|    |              |              |             |
|----|--------------|--------------|-------------|
| Ta | 1.912329430  | -0.098111910 | 0.045467872 |
| O  | 1.841258905  | 1.094631135  | 1.543779751 |
| C  | 1.299481147  | 1.967158557  | 2.426178229 |
| C  | 1.617374796  | 1.865466222  | 3.786243582 |
| C  | 1.058440889  | 2.765985564  | 4.692550933 |
| C  | 0.187726991  | 3.765848112  | 4.251848819 |
| C  | -0.122857431 | 3.860632292  | 2.892487551 |
| C  | 0.428948147  | 2.968141458  | 1.974378312 |

---

|   |              |              |              |   |              |              |              |
|---|--------------|--------------|--------------|---|--------------|--------------|--------------|
| C | -1.381894958 | 5.914457990  | 0.767123588  | O | 0.194772246  | 0.587025313  | -0.585798471 |
| C | -1.046018119 | 4.632808980  | 0.309040313  | C | -1.101701356 | 0.179199533  | -0.591076680 |
| C | -1.251602984 | 4.317031300  | -1.166759058 | C | -1.806736003 | 0.017741432  | 0.610839822  |
| C | -2.742374858 | 4.415451647  | -1.544595896 | C | -3.140466822 | -0.390441876 | 0.582032888  |
| C | -0.410152861 | 5.233874030  | -2.076188292 | C | -3.782984703 | -0.631975195 | -0.634413363 |
| O | -2.031175968 | 1.037021096  | -0.527652250 | C | -3.078255584 | -0.460030165 | -1.829293155 |
| C | -3.379043628 | 0.862118974  | -0.549932266 | C | -1.744185388 | -0.055819762 | -1.814552375 |
| C | -4.153803174 | 1.180777052  | 0.589509310  | O | 1.885935346  | -1.405098984 | -1.351274257 |
| C | -3.516683341 | 1.684911616  | 1.877279252  | C | 1.602899958  | -2.274738590 | -2.343607577 |
| C | -3.514520824 | 0.600123377  | 2.972410016  | C | 0.778137502  | -3.379788419 | -2.093617922 |
| C | -4.176094568 | 2.977037937  | 2.390897809  | C | 0.489861305  | -4.269698159 | -3.126782915 |
| C | -5.541238652 | 1.006018006  | 0.515994883  | C | 1.018512776  | -4.070487488 | -4.404892198 |
| C | -6.154912828 | 0.539105808  | -0.641977548 | C | 1.841825496  | -2.967495783 | -4.645430481 |
| C | -5.373782193 | 0.235774399  | -1.756645878 | C | 2.138164357  | -2.067949544 | -3.622243755 |
| C | -3.983549028 | 0.383045367  | -1.738638303 | C | 2.942983827  | -1.513704654 | 1.250152277  |
| C | -3.137937438 | 0.058165418  | -2.962907141 | C | 4.217341306  | -0.760951110 | 0.645719108  |
| C | -2.876129221 | 1.316632730  | -3.812899106 | C | 3.910644376  | 0.433168189  | -0.373612347 |
| C | -3.728469874 | -1.065848246 | -3.827783938 | H | 2.298650730  | 1.085936549  | 4.112576795  |
| O | -0.371050248 | -1.079277000 | -0.698887697 | H | 1.306523049  | 2.685841727  | 5.747158191  |
| C | -0.809250071 | -2.215316931 | -1.309236030 | H | -0.245142902 | 4.464650472  | 4.961048480  |
| C | -1.709878947 | -3.073915043 | -0.638226232 | H | -0.800015035 | 4.634220027  | 2.541546617  |
| C | -2.214010330 | -2.799651200 | 0.771281496  | H | 0.192486051  | 3.020883450  | 0.917137701  |
| C | -1.686408106 | -3.856065650 | 1.762284800  | H | -1.308151230 | 0.232172119  | 1.551439313  |
| C | -3.751143480 | -2.727300101 | 0.830796599  | H | -3.679377299 | -0.514991359 | 1.517235203  |
| C | -2.130940755 | -4.232164011 | -1.302778363 | H | -4.821531939 | -0.948210613 | -0.651855937 |
| C | -1.686329723 | -4.544560225 | -2.583393856 | H | -3.568910783 | -0.643141684 | -2.781332472 |
| C | -0.797671188 | -3.685666019 | -3.225791375 | H | -1.183712082 | 0.077129540  | -2.733901877 |
| C | -0.343574343 | -2.513527313 | -2.614242162 | H | 0.369166165  | -3.518513576 | -1.097832804 |
| C | 0.654200385  | -1.612125625 | -3.328580256 | H | -0.153998764 | -5.122323486 | -2.930623916 |
| C | 0.314314302  | -1.377295387 | -4.810362246 | H | 0.789571745  | -4.766609446 | -5.205794493 |
| C | 2.087826829  | -2.165384527 | -3.193303266 | H | 2.255585146  | -2.802573208 | -5.636336344 |
| C | 0.891028260  | -0.054798359 | 1.750701890  | H | 2.772908680  | -1.204307092 | -3.794388214 |
| C | 2.153370168  | 0.431778977  | 0.820350058  | H | 2.912896665  | -2.558474274 | 0.946554524  |
| C | 1.804785094  | 0.829577229  | -0.665723732 | H | 2.889839022  | -1.409615979 | 2.331892203  |
| C | 1.291511052  | -1.474745490 | 2.184989080  | H | 4.816638404  | -1.496415436 | 0.110760683  |
| C | 2.401669606  | -1.329917788 | 3.259493552  | H | 4.779067019  | -0.337271158 | 1.477106965  |
| C | 3.624080226  | -0.827398574 | 2.425004778  | H | 4.256986672  | 1.394379063  | 0.002009149  |
| C | 3.082767342  | -0.808460599 | 0.971714647  | H | 4.295049060  | 0.228552650  | -1.371181349 |
| C | 2.110533046  | -2.002865691 | 0.992060507  |   |              |              |              |
| C | 2.621282472  | 1.967940481  | -1.325363497 |   |              |              |              |
| C | 2.017970503  | 2.229506562  | -2.721172854 |   |              |              |              |
| C | 2.632577570  | 3.284844351  | -0.531079140 |   |              |              |              |
| C | 4.086257943  | 1.505541692  | -1.509425777 |   |              |              |              |
| H | -0.189894816 | 2.050722162  | 3.278034460  |   |              |              |              |
| H | 2.074423420  | 2.965360604  | 2.688723856  |   |              |              |              |
| H | 2.046041688  | 2.331608446  | 4.347847520  |   |              |              |              |
| H | 1.971553230  | 4.079210261  | 4.055596028  |   |              |              |              |
| H | -1.578567518 | 3.206901217  | 5.029082305  |   |              |              |              |
| H | -0.146335722 | 4.120701208  | 5.531632842  |   |              |              |              |
| H | -0.158674453 | 2.365467123  | 5.675534205  |   |              |              |              |
| H | -0.710582354 | 5.609388002  | 4.066673117  |   |              |              |              |
| H | -1.529920812 | 7.274344602  | 2.429804954  |   |              |              |              |
| H | -1.757625278 | 6.640634303  | 0.052062338  |   |              |              |              |
| H | -0.936725670 | 3.285641633  | -1.341723047 |   |              |              |              |
| H | -2.887506554 | 4.182697628  | -2.604168929 |   |              |              |              |
| H | -3.124737526 | 5.427714261  | -1.373774610 |   |              |              |              |
| H | -3.348755664 | 3.719730397  | -0.960020720 |   |              |              |              |
| H | -0.523760704 | 4.936540984  | -3.124675594 |   |              |              |              |
| H | 0.652743720  | 5.190915578  | -1.823673830 |   |              |              |              |
| H | -0.730141904 | 6.278298764  | -1.994449213 |   |              |              |              |
| H | -2.477511564 | 1.929805614  | 1.653685571  |   |              |              |              |
| H | -2.988919276 | -0.301757187 | 2.642187892  |   |              |              |              |

---

---

|   |              |              |              |
|---|--------------|--------------|--------------|
| H | -4.536562790 | 0.308878707  | 3.240058185  |
| H | -3.021250665 | 0.967655451  | 3.879906656  |
| H | -4.168052598 | 3.755738132  | 1.622830132  |
| H | -3.632601635 | 3.360754660  | 3.260571372  |
| H | -5.215034668 | 2.810543614  | 2.695687707  |
| H | -6.148199695 | 1.238712766  | 1.386640698  |
| H | -7.232995422 | 0.411532595  | -0.678744103 |
| H | -5.855908548 | -0.132784589 | -2.656352840 |
| H | -2.169539977 | -0.289984984 | -2.596579510 |
| H | -2.368673226 | 2.085803488  | -3.226482664 |
| H | -3.816220487 | 1.738820902  | -4.186208460 |
| H | -2.246782475 | 1.076112357  | -4.677951992 |
| H | -3.933860719 | -1.960983688 | -3.233523622 |
| H | -3.021591007 | -1.343333209 | -4.616142438 |
| H | -4.657119964 | -0.758754132 | -4.321875881 |
| H | -1.819773493 | -1.828548567 | 1.084572866  |
| H | -1.986629724 | -3.607609432 | 2.786637388  |
| H | -0.595074685 | -3.926770195 | 1.730481277  |
| H | -2.088814413 | -4.848299717 | 1.529913303  |
| H | -4.081299635 | -2.464570829 | 1.841443669  |
| H | -4.201349982 | -3.693831667 | 0.579103652  |
| H | -4.145888207 | -1.979733870 | 0.139300671  |
| H | -2.822928404 | -4.901580587 | -0.799650841 |
| H | -2.027814006 | -5.449706756 | -3.076738123 |
| H | -0.447635554 | -3.929762502 | -4.224086678 |
| H | 0.619760954  | -0.636977574 | -2.836982830 |
| H | -0.705757327 | -1.001969803 | -4.932613245 |
| H | 0.410999336  | -2.292042199 | -5.404738275 |
| H | 1.001216542  | -0.639679185 | -5.239438193 |
| H | 2.812039705  | -1.491681250 | -3.666128650 |
| H | 2.169508772  | -3.143508995 | -3.680610145 |
| H | 2.374361762  | -2.294146166 | -2.145470625 |
| H | 0.796036587  | 0.610967639  | 2.606237826  |
| H | 2.574287404  | 1.320713742  | 1.289192148  |
| H | 1.934330441  | -0.059635870 | -1.287805166 |
| H | 0.446793677  | -2.087667485 | 2.505256314  |
| H | 2.117133426  | -0.637480884 | 4.058282443  |
| H | 2.613355572  | -2.298745230 | 3.725785021  |
| H | 4.469517971  | -1.518847135 | 2.503595262  |
| H | 3.980650945  | 0.157557188  | 2.743961416  |
| H | 3.865185779  | -0.839605950 | 0.210612542  |
| H | 2.618782814  | -2.948304372 | 1.212537505  |
| H | 1.528372939  | -2.118507831 | 0.079991714  |
| H | 0.985141593  | 2.582406111  | -2.645529452 |
| H | 2.018334352  | 1.318397923  | -3.329836881 |
| H | 2.596923502  | 2.989236465  | -3.258251705 |
| H | 3.117696816  | 3.172860991  | 0.444164898  |
| H | 1.626802253  | 3.667238193  | -0.361028178 |
| H | 3.200103149  | 4.042421812  | -1.083498765 |
| H | 4.579683289  | 1.345497670  | -0.545058351 |
| H | 4.662301185  | 2.263604805  | -2.052724545 |
| H | 4.141971149  | 0.570461092  | -2.078007491 |

---

**Calculated DFT DOWFUQ10 Real - Structure 7**

|    |              |              |              |
|----|--------------|--------------|--------------|
| W  | -0.020474398 | -0.012001138 | -0.031885763 |
| Si | -0.308355684 | 2.624117434  | -2.356441952 |
| Si | 1.801424917  | 3.422955181  | 1.230520546  |
| C  | 0.264139142  | 1.096039227  | 1.716580686  |
| C  | 0.394079598  | 2.254080916  | 0.616591927  |
| C  | 0.608614283  | 1.781353400  | -0.895586555 |

**Calculated DFT DOWFUQ10 Model - Structure 7a**

|   |              |              |              |
|---|--------------|--------------|--------------|
| W | 0.151597530  | -0.338400854 | -0.487269399 |
| C | 1.614137606  | 1.144489124  | -0.646595457 |
| C | 1.548752853  | 1.020239754  | 0.948172146  |
| C | 0.512275541  | -0.040510532 | 1.547716500  |
| N | -1.189479610 | 0.841355367  | -0.541327030 |
| C | -2.229345665 | 1.735981578  | -0.629090682 |

---

---

|   |              |              |              |   |              |              |              |
|---|--------------|--------------|--------------|---|--------------|--------------|--------------|
| C | -1.472577438 | 1.428493009  | -3.239477778 | C | -2.251847663 | 2.711372974  | -1.649148146 |
| C | 1.045205100  | 3.119407974  | -3.589676910 | C | -3.300027989 | 3.623929481  | -1.724046286 |
| C | -1.264522175 | 4.161092819  | -1.815329999 | C | -4.343540970 | 3.583528225  | -0.794413518 |
| C | 2.107339063  | 4.819729748  | -0.004933153 | C | -4.330327160 | 2.618738624  | 0.217263926  |
| C | 3.416410954  | 2.474832093  | 1.477406603  | C | -3.286692611 | 1.701702684  | 0.305178439  |
| C | 1.220952799  | 4.167362984  | 2.866727171  | O | -0.711809339 | -1.649551733 | -1.607648547 |
| N | 1.623570336  | -0.664452509 | 0.077515546  | C | -1.956720971 | -1.598382959 | -2.276915205 |
| C | 2.914256178  | -1.106032397 | 0.304626019  | O | 1.607235176  | -1.623504378 | -0.477605561 |
| C | 3.263656411  | -1.694979582 | 1.555537890  | C | 1.981307852  | -2.861726057 | -1.008547011 |
| C | 4.595313820  | -2.062513483 | 1.767172754  | H | 1.336689178  | 2.137586764  | -0.988776772 |
| C | 5.569018027  | -1.878473924 | 0.789321950  | H | 2.574653123  | 0.815967718  | -1.036163831 |
| C | 5.211349762  | -1.337281324 | -0.442945025 | H | 1.263248828  | 1.998005641  | 1.331678138  |
| C | 3.897793738  | -0.951279019 | -0.718902808 | H | 2.539355558  | 0.719122559  | 1.283652352  |
| C | 3.563449691  | -0.404665924 | -2.103593883 | H | 1.020561155  | -0.853189298 | 2.062069102  |
| C | 3.873189798  | -1.436888968 | -3.206295556 | H | -0.251540768 | 0.430661411  | 2.159953252  |
| C | 4.300344161  | 0.916528572  | -2.398073184 | H | -1.439944543 | 2.732414427  | -2.368882826 |
| C | 2.238675100  | -1.960481632 | 2.651848741  | H | -3.305137253 | 4.369780467  | -2.513930173 |
| C | 2.101510316  | -3.469597347 | 2.933536608  | H | -5.160429514 | 4.295900084  | -0.859013829 |
| C | 2.572297699  | -1.198837224 | 3.948746829  | H | -5.139229413 | 2.580123465  | 0.941544456  |
| F | -1.363749701 | -4.341264873 | -2.974387136 | H | -3.271176145 | 0.945395447  | 1.083320350  |
| F | -0.851762271 | -2.276703814 | -3.453162055 | H | -2.391772119 | -2.605210358 | -2.289942349 |
| F | -2.718003101 | -2.728186254 | -2.431981172 | H | -1.821617415 | -1.268622947 | -3.315806589 |
| F | -0.667046424 | -3.591457768 | 1.099027819  | H | -2.659888123 | -0.916020173 | -1.784890121 |
| F | -1.114663391 | -5.136505165 | -0.373412311 | H | 2.149155160  | -3.589809332 | -0.202569782 |
| F | -2.596969333 | -3.617072023 | 0.094289398  | H | 2.915990074  | -2.767512911 | -1.578778892 |
| O | -0.893723172 | -1.601105648 | -0.771912312 | H | 1.194549436  | -3.243917439 | -1.672418024 |
| C | -0.665165759 | -2.911797689 | -1.172415693 |   |              |              |              |
| C | -1.423050204 | -3.071382388 | -2.519559780 |   |              |              |              |
| C | -1.280583375 | -3.830064769 | -0.083105249 |   |              |              |              |
| C | 0.800672629  | -3.303458049 | -1.389468398 |   |              |              |              |
| F | -3.143663097 | 2.848088312  | 1.070365845  |   |              |              |              |
| F | -3.977191724 | 2.318964040  | -0.865427426 |   |              |              |              |
| F | -5.109991255 | 1.915329438  | 0.950654475  |   |              |              |              |
| F | -2.783106177 | 0.867587052  | 2.839534948  |   |              |              |              |
| F | -2.510960575 | -1.143360991 | 2.047103119  |   |              |              |              |
| F | -4.516099911 | -0.339610429 | 2.322400433  |   |              |              |              |
| O | -1.899196130 | 0.662376900  | 0.089682338  |   |              |              |              |
| C | -3.211248798 | 0.508545101  | 0.481166706  |   |              |              |              |
| C | -3.870309735 | 1.912470205  | 0.420158942  |   |              |              |              |
| C | -3.262698602 | -0.025893156 | 1.941775915  |   |              |              |              |
| C | -3.988041892 | -0.459650274 | -0.425346933 |   |              |              |              |
| H | 1.172539538  | 0.898129111  | 2.278156899  |   |              |              |              |
| H | -0.592380181 | 1.282154752  | 2.355513737  |   |              |              |              |
| H | -0.564867996 | 2.771503374  | 0.646725492  |   |              |              |              |
| H | 1.668960425  | 1.731548400  | -1.144640417 |   |              |              |              |
| H | -2.351437975 | 1.221410278  | -2.625827811 |   |              |              |              |
| H | -0.989756794 | 0.471998086  | -3.465224611 |   |              |              |              |
| H | -1.812328085 | 1.863999942  | -4.186447019 |   |              |              |              |
| H | 1.746839653  | 3.848643557  | -3.171086732 |   |              |              |              |
| H | 0.600620008  | 3.565552317  | -4.486462354 |   |              |              |              |
| H | 1.624090052  | 2.246694356  | -3.912938295 |   |              |              |              |
| H | -2.032156234 | 3.930441580  | -1.073309715 |   |              |              |              |
| H | -1.772290751 | 4.592774420  | -2.685915765 |   |              |              |              |
| H | -0.605834447 | 4.931731312  | -1.404626325 |   |              |              |              |
| H | 2.424963774  | 4.444971521  | -0.982602169 |   |              |              |              |
| H | 2.904046454  | 5.471761944  | 0.371894215  |   |              |              |              |
| H | 1.219031279  | 5.441035201  | -0.153099387 |   |              |              |              |
| H | 3.354217941  | 1.730316352  | 2.275849723  |   |              |              |              |
| H | 4.207329448  | 3.183330455  | 1.750394991  |   |              |              |              |
| H | 3.741350609  | 1.953905334  | 0.572752485  |   |              |              |              |
| H | 1.077669473  | 3.399945955  | 3.633702762  |   |              |              |              |
| H | 0.271279937  | 4.699978404  | 2.746547250  |   |              |              |              |

---

---

|   |              |              |              |
|---|--------------|--------------|--------------|
| H | 1.957184991  | 4.885378958  | 3.245136535  |
| H | 4.874502892  | -2.505213536 | 2.718871522  |
| H | 6.598558497  | -2.166096015 | 0.981514706  |
| H | 5.969884766  | -1.214681723 | -1.210811492 |
| H | 2.489457700  | -0.204451424 | -2.131123979 |
| H | 3.363753482  | -2.386993281 | -3.022163460 |
| H | 4.946763050  | -1.643885243 | -3.270368261 |
| H | 3.549842221  | -1.059314844 | -4.182321441 |
| H | 4.059453517  | 1.688629011  | -1.661506641 |
| H | 4.024601590  | 1.297319895  | -3.387316562 |
| H | 5.386754991  | 0.777232099  | -2.386585567 |
| H | 1.268276716  | -1.606808650 | 2.297743278  |
| H | 1.336239892  | -3.643734480 | 3.697167608  |
| H | 3.042361312  | -3.896004226 | 3.297850086  |
| H | 1.807449077  | -4.017228059 | 2.034407042  |
| H | 1.782274735  | -1.349307105 | 4.691988289  |
| H | 2.670867432  | -0.123108421 | 3.772323046  |
| H | 3.513398393  | -1.547710669 | 4.387693001  |
| H | 1.252338294  | -2.619195653 | -2.106909711 |
| H | 0.864029703  | -4.322017862 | -1.776728372 |
| H | 1.352459439  | -3.242741111 | -0.453361590 |
| H | -5.045596117 | -0.487427030 | -0.154647951 |
| H | -3.888232689 | -0.134498089 | -1.460599557 |
| H | -3.559350657 | -1.455034888 | -0.336965263 |

---

Table 2. X-ray geometries obtained from CCDC and the geometry parameters of the metallacyclobutane region. The four examples were chosen out of this list.

| Ref.                   | Metal | C1-C2 | C2-C3 | M-C2  |
|------------------------|-------|-------|-------|-------|
| CUJKUN <sup>15</sup>   | Au    | 1.557 | 1.584 | 2.717 |
| XUHCOS <sup>16</sup>   | Zr    | 1.559 | 1.572 | 2.588 |
| KORFIG <sup>17</sup>   | Ti    | 1.521 | 1.520 | 1.469 |
| BUVMAG <sup>18</sup>   | Co    | 1.525 | 1.525 | 2.564 |
| DBSBFE10 <sup>19</sup> | Fe    | 1.525 | 1.527 | 2.691 |
| VETHUX <sup>20</sup>   | Fe    | 1.541 | 1.541 | 2.618 |
| SOYVUX <sup>21</sup>   | Ir    | 1.539 | 1.532 | 2.715 |
| WUWNOR <sup>22</sup>   | W     | 1.521 | 1.528 | 2.762 |
| WUWNIL <sup>22</sup>   | W     | 1.541 | 1.526 | 2.730 |
| BILWEY <sup>23</sup>   | Ti    | 1.545 | 1.578 | 2.537 |
| BILWIC <sup>23</sup>   | Ti    | 1.576 | 1.589 | 2.600 |
| DOWFUQ <sup>24</sup>   | W     | 1.605 | 1.625 | 2.372 |
| DOWFUQ10 <sup>25</sup> | W     | 1.605 | 1.625 | 2.372 |
| GAJKEH <sup>25</sup>   | W     | 1.532 | 1.586 | 2.324 |
| GIFHAE <sup>26</sup>   | Ta    | 1.549 | 1.556 | 2.382 |
| TOKZEY <sup>27</sup>   | Ti    | 1.551 | 1.557 | 2.601 |
| SESBOH <sup>28</sup>   | Ti    | 1.537 | 1.593 | 2.541 |
| TOKZEY01 <sup>29</sup> | Ti    | 1.551 | 1.557 | 2.601 |
| JEJKEO <sup>30</sup>   | Ti    | 1.560 | 1.596 | 2.533 |
| ZULIVOR <sup>31</sup>  | Ti    | 1.528 | 1.537 | 2.670 |
| DULSEI <sup>32</sup>   | Ni    | 1.526 | 1.526 | 2.558 |
| PITBOJ <sup>33</sup>   | Cr    | 1.528 | 1.528 | 2.710 |
| ZIXHAP <sup>34</sup>   | Ti    | 1.538 | 1.547 | 2.646 |
| QOFTEK <sup>35</sup>   | Ti    | 1.557 | 1.559 | 2.638 |
| QOFTAG <sup>35</sup>   | Ti    | 1.552 | 1.553 | 2.614 |
| RISHEG <sup>36</sup>   | Ta    | 1.517 | 1.529 | 2.894 |
| RISHIK <sup>36</sup>   | Ta    | 1.499 | 1.543 | 2.880 |
| FAKPAI <sup>37</sup>   | Ta    | 1.473 | 1.592 | 2.781 |
| ROMSER <sup>38</sup>   | Nb    | 1.581 | 1.601 | 2.441 |
| NAFZOJ01 <sup>39</sup> | Ta    | 1.514 | 1.535 | 2.868 |
| ROMSIV01 <sup>40</sup> | Nb    | 1.562 | 1.652 | 2.403 |
| HISKAV <sup>40</sup>   | Ta    | 1.578 | 1.613 | 2.637 |
| YIJFAY <sup>41</sup>   | Pd    | 1.528 | 1.535 | 2.636 |
| FUMJAY <sup>42</sup>   | W     | 1.519 | 1.522 | 2.794 |
| VIJREL <sup>43</sup>   | Ru    | 1.532 | 1.544 | 2.774 |
| VIJRIP <sup>43</sup>   | Ru    | 1.542 | 1.549 | 2.755 |
| YUGYUU <sup>44</sup>   | Ru    | 1.551 | 1.551 | 2.814 |
| YUGYUU01 <sup>45</sup> | Ru    | 1.551 | 1.551 | 2.814 |
| SILWUF <sup>46</sup>   | W     | 1.496 | 1.525 | 2.811 |
| KAXDES <sup>47</sup>   | W     | 1.549 | 1.570 | 2.789 |
| KAXDIW <sup>48</sup>   | W     | 1.530 | 1.543 | 2.772 |

|                        |    |       |       |       |
|------------------------|----|-------|-------|-------|
| KAXDES10 <sup>49</sup> | W  | 1.549 | 1.570 | 2.789 |
| PCYBPT <sup>50</sup>   | Pt | 1.509 | 1.556 | 2.687 |
| TCPPTB <sup>50</sup>   | Pt | 1.548 | 1.557 | 2.694 |
| BPRPTB10 <sup>51</sup> | Pt | 1.626 | 1.626 | 2.755 |
| BIBFUN <sup>51</sup>   | Pt | 1.534 | 1.535 | 2.665 |
| CURYIX <sup>52</sup>   | Pt | 1.540 | 1.543 | 2.594 |
| GETVOQ <sup>53</sup>   | Pt | 1.535 | 1.536 | 2.680 |
| CPPYPT10 <sup>54</sup> | Pt | 1.832 | 1.475 | 2.709 |
| CYPTBU <sup>55</sup>   | Pt | 1.545 | 1.585 | 2.712 |
| CECRUX <sup>56</sup>   | Pt | 1.542 | 1.548 | 2.676 |
| BELPAJ <sup>57</sup>   | Pt | 1.535 | 1.536 | 2.698 |
| YEGQUW <sup>58</sup>   | Rh | 1.548 | 1.580 | 2.565 |
| FEGXOE <sup>59</sup>   | Rh | 1.537 | 1.548 | 2.645 |
| DIMSOH10 <sup>60</sup> | Rh | 1.531 | 1.541 | 2.739 |
| CORMOL <sup>61</sup>   | Rh | 1.512 | 1.527 | 2.714 |

## References

1. Jaguar 5.5, Schrödinger, Inc., Portland, Oregon, 2003.
2. Becke, A. D., *Phys. Rev. A* **1988**, *38*, 3098-3100.
3. Becke, A. D., *J. Chem. Phys.* **1993**, *98*, 5648-5652.
4. Lee, C. T.; Yang, W. T.; Parr, R. G., *Phys. Rev. B* **1988**, *37*, 785-789.
5. Vosko, S. H.; Wilk, L.; Nusair, M., *Can. J. Phys.* **1980**, *58*, 1200-1211.
6. Hay, P. J.; Wadt, W. R., *J. Chem. Phys.* **1985**, *82*, 270-283.
7. Wadt, W. R.; Hay, P. J., *J. Chem. Phys.* **1985**, *82*, 284-298.
8. Dunning, T. H., *J. Chem. Phys.* **1989**, *90*, 1007-1023.
9. Mayer, I., *Chem. Phys. Lett.* **1983**, *97*, 270-274.
10. Mayer, I., *Int. J. Quantum Chem.* **1986**, *29*, 477-483.
11. Mayer, I., *Int. J. Quantum Chem.* **1986**, *29*, 73-84.
12. Baerends, E. J.; Gritsenko, O. V., *J. Phys. Chem. A* **1997**, *101*, 5383-5403.
13. Velde, G. T.; Bickelhaupt, F. M.; Baerends, E. J.; Guerra, C. F.; Van Gisbergen, S. J. A.; Snijders, J. G.; Ziegler, T., *J. Comput. Chem.* **2001**, *22*, 931-967.
14. Guerra, C. F.; Snijders, J. G.; te Velde, G.; Baerends, E. J., *Theor. Chem. Acc.* **1998**, *99*, 391-403.
15. Dinger, M. B.; Henderson, W., *Journal of Organometallic Chemistry* **1999**, *577*, 219-222.
16. Binger, P.; Muller, P.; Podubrin, S.; Albus, S.; Kruger, C., *Journal of Organometallic Chemistry* **2002**, *656*, 288-298.
17. Beckhaus, R.; Flatau, S.; Trojanov, S.; Hofmann, P., *Chemische Berichte-Recueil* **1992**, *125*, 291-299.
18. Hughes, R. P.; Samkoff, D. E.; Davis, R. E.; Laird, B. B., *Organometallics* **1983**, *2*, 195-197.
19. Flippen, J. L., *Inorganic Chemistry* **1974**, *13*, 1054.
20. Karel, K. J.; Tulip, T. H.; Ittel, S. D., *Organometallics* **1990**, *9*, 1276-1282.
21. Tjaden, E. B.; Schwiebert, K. E.; Stryker, J. M., *Journal of the American Chemical Society* **1992**, *114*, 1100-1102.
22. Tsang, W. C. P.; Hultsch, K. C.; Alexander, J. B.; Bonitatebus, P. J.; Schrock, R. R.; Hoveyda, A. H., *Journal of the American Chemical Society* **2003**, *125*, 2652-2666.
23. Lee, J. B.; Gajda, G. J.; Schaefer, W. P.; Howard, T. R.; Ikariya, T.; Straus, D. A.; Grubbs, R. H., *Journal of the American Chemical Society* **1981**, *103*, 7358-7361.
24. Schaverien, C. J.; Dewan, J. C.; Schrock, R. R., *Journal of the American Chemical Society* **1986**, *108*, 2771-2773.
25. Schrock, R. R.; Depue, R. T.; Feldman, J.; Schaverien, C. J.; Dewan, J. C.; Liu, A. H., *Journal of the American Chemical Society* **1988**, *110*, 1423-1435.
26. Wallace, K. C.; Liu, A. H.; Dewan, J. C.; Schrock, R. R., *Journal of the American Chemical Society* **1988**, *110*, 4964-4977.
27. Polse, J. L.; Andersen, R. A.; Bergman, R. G., *Journal of the American Chemical Society* **1996**, *118*, 8737-8738.
28. Tomaszewski, R.; Hyla-Kryspin, I.; Mayne, C. L.; Arif, A. M.; Gleiter, R.; Ernst, R. D., *Journal of the American Chemical Society* **1998**, *120*, 2959-2960.
29. Polse, J. L.; Kaplan, A. W.; Andersen, R. A.; Bergman, R. G., *Journal of the American Chemical Society* **1998**, *120*, 6316-6328.



30. Stille, J. R.; Santarsiero, B. D.; Grubbs, R. H., *Journal of Organic Chemistry* **1990**, *55*, 843-862.
31. Rosenthal, U.; Lefeber, C.; Arndt, P.; Tillack, A.; Baumann, W.; Kempe, R.; Burlakov, V. V., *Journal of Organometallic Chemistry* **1995**, *503*, 221-223.
32. Hughes, R. P.; Carl, R. T.; Samkoff, D. E.; Davis, R. E.; Holland, K. D., *Organometallics* **1986**, *5*, 1053-1055.
33. Hao, S. K.; Song, J. I.; Berno, P.; Gambarotta, S., *Organometallics* **1994**, *13*, 1326-1335.
34. Brinkmann, P. H. P.; Prosenc, M. H.; Luinstra, G. A., *Organometallics* **1995**, *14*, 5481-5482.
35. Greidanus, G.; McDonald, R.; Stryker, J. M., *Organometallics* **2001**, *20*, 2492-2504.
36. Rietveld, M. H. P.; Hagen, H.; vandeWater, L.; Grove, D. M.; Kooijman, H.; Veldman, N.; Spek, A. L.; vanKoten, G., *Organometallics* **1997**, *16*, 168-177.
37. Wallace, K. C.; Dewan, J. C.; Schrock, R. R., *Organometallics* **1986**, *5*, 2162-2164.
38. Mashima, K.; Kaidzu, M.; Nakayama, Y.; Nakamura, A., *Organometallics* **1997**, *16*, 1345-1348.
39. Rietveld, M. H. P.; Teunissen, W.; Hagen, H.; vandeWater, L.; Grove, D. M.; vanderSchaaf, P. A.; Muhlebach, A.; Kooijman, H.; Smeets, W. J. J.; Veldman, N.; Spek, A. L.; vanKoten, G., *Organometallics* **1997**, *16*, 1674-1684.
40. Mashima, K.; Kaidzu, M.; Tanaka, Y.; Nakayama, Y.; Nakamura, A.; Hamilton, J. G.; Rooney, J. J., *Organometallics* **1998**, *17*, 4183-4195.
41. Hoffmann, H. M. R.; Otte, A. R.; Wilde, A.; Menzer, S.; Williams, D. J., *Angewandte Chemie-International Edition in English* **1995**, *34*, 100-102.
42. Hein, J.; Jeffery, J. C.; Marken, F.; Stone, F. G. A., *Polyhedron* **1987**, *6*, 2067-2071.
43. Diversi, P.; Ingrosso, G.; Lucherini, A.; Marchetti, F.; Adovasio, V.; Nardelli, M., *Journal of the Chemical Society-Dalton Transactions* **1991**, 203-213.
44. McNeill, K.; Andersen, R. A.; Bergman, R. G., *Journal of the American Chemical Society* **1995**, *117*, 3625-3626.
45. McNeill, K.; Andersen, R. A.; Bergman, R. G., *Journal of the American Chemical Society* **1997**, *119*, 11244-11254.
46. Bazan, G. C.; Khosravi, E.; Schrock, R. R.; Feast, W. J.; Gibson, V. C.; Oregan, M. B.; Thomas, J. K.; Davis, W. M., *Journal of the American Chemical Society* **1990**, *112*, 8378-8387.
47. Feldman, J.; Davis, W. M.; Schrock, R. R., *Organometallics* **1989**, *8*, 2266-2268.
48. Feldman, J.; Murdzek, J. S.; Davis, W. M.; Schrock, R. R., *Organometallics* **1989**, *8*, 2260-2265.
49. Feldman, J.; Davis, W. M.; Thomas, J. K.; Schrock, R. R., *Organometallics* **1990**, *9*, 2535-2548.
50. Rajaram, J.; Ibers, J. A., *Journal of the American Chemical Society* **1978**, *100*, 829-838.
51. Klingler, R. J.; Huffman, J. C.; Kochi, J. K., *Journal of the American Chemical Society* **1982**, *104*, 2147-2157.
52. Parsons, E. J.; Larsen, R. D.; Jennings, P. W., *Journal of the American Chemical Society* **1985**, *107*, 1793-1794.
53. Neilsen, W. D.; Larsen, R. D.; Jennings, P. W., *Journal of the American Chemical Society* **1988**, *110*, 3307-3308.

54. Gillard, R. D.; Keeton, M.; Mason, R.; Pilbrow, M. F.; Russell, D. R., *J. Organomet. Chem.* **1971**, *33*, 247.
55. Yarrow, D. J.; Ibers, J. A.; Lenarda, M. L.; Graziani, M., *J. Organomet. Chem.* **1974**, *70*, 133.
56. Burton, J. T.; Puddephatt, R. J.; Jones, N. L.; Ibers, J. A., *Organometallics* **1983**, *2*, 1487-1494.
57. Ibers, J. A.; Dicosimo, R.; Whitesides, G. M., *Organometallics* **1982**, *1*, 13-20.
58. Vogt, M.; Reggelin, M.; Schollmeyer, D., *CCDC 166888* **2001**.
59. Wick, D. D.; Northcutt, T. O.; Lachicotte, R. J.; Jones, W. D., *Organometallics* **1998**, *17*, 4484-4492.
60. Andreucci, L.; Diversi, P.; Ingrosso, G.; Lucherini, A.; Marchetti, F.; Adovasio, V.; Nardelli, M., *Journal of the Chemical Society-Dalton Transactions* **1986**, 477-487.
61. Periana, R. A.; Bergman, R. G., *Journal of the American Chemical Society* **1984**, *106*, 7272-7273.
